# Supplementary material for: Highly porous reticular tin–cobalt oxide composite thin film anodes for lithium ion batteries
Source: Royal Society of Chemistry journal article supplement (doi:10.1039/b913993a), 2009-01-01

## **Supporting information**

**For**

# **Highly porous reticular tin-cobalt oxide composite thin film anodes for lithium ion batteries**

**Xian Jun Zhu,<sup>ab</sup> Zai Ping Guo,<sup>bc</sup> Peng Zhang,<sup>b</sup> Guo Dong Du,<sup>b</sup> Rong Zeng,<sup>b</sup> Zhi Xin Chen,<sup>c</sup>  
Sean Li<sup>d</sup> and Hua Kun Liu<sup>b</sup>**

<sup>a</sup> College of Chemistry, Central China Normal University, Wuhan, Hubei 430079, China

<sup>b</sup> Institute for Superconducting & Electronic Materials, University of Wollongong, NSW 2522,  
Australia

<sup>c</sup> School of Mechanical, Materials & Mechatronic Engineering, University of Wollongong, NSW  
2522, Australia

<sup>d</sup> School of Materials Science and Engineering, University of New South Wales, NSW 2052,  
Australia

Email: [zguo@uow.edu.au](mailto:zguo@uow.edu.au)

**Fig. S1** XRD pattern of the tin-cobalt oxide thin film prepared at 200 °C for 3 h on stainless steel.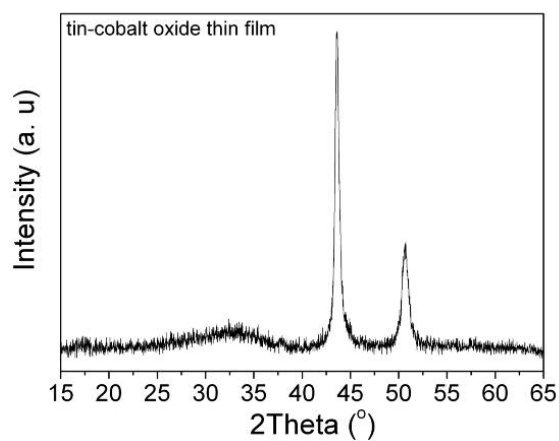**Fig. S2** XRD pattern of the tin oxide thin film prepared at 200 °C for 3 h on stainless steel.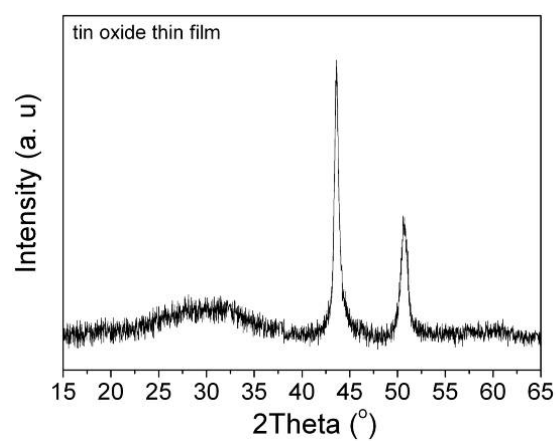**Fig. S3** XRD pattern of stainless steel.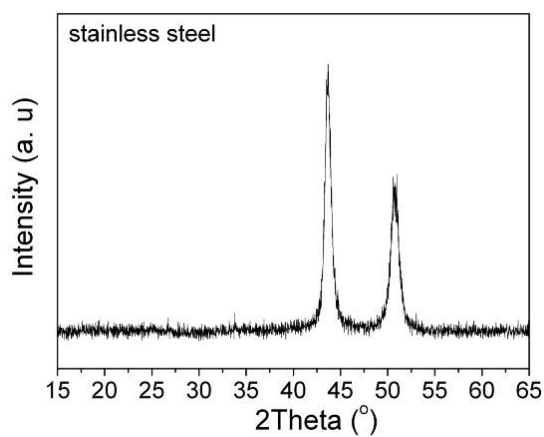

Supplement: b913993a.pdf [file b913993a.pdf]
